# Supplementary material for: A cyclopentasilane–borane compound as a liquid precursor for p-type semiconducting Si
Source: Royal Society of Chemistry journal article supplement (doi:10.1039/d1tc00165e), 2021-01-01
Supplement: d1tc00165e1.pdf [file d1tc00165e1.pdf]

## Supplementary Information

### Cyclopentasilane–borane compound as liquid precursor for p-type semiconducting Si

Takashi Masuda,<sup>\*a,b,c</sup> Maui Nakayama,<sup>a</sup> Kimihiko Saito,<sup>d</sup> Hirotaka Katayama,<sup>e</sup> and Akira Terakawa<sup>e</sup>

<sup>a</sup> School of Material Science, Japan Advanced Institute of Science and Technology, Ishikawa 923-1292, Japan

<sup>b</sup> Cucullus Inc., 1-18, Chuo-dori, Kanazawa, Ishikawa, Japan

<sup>c</sup> Verein artworker.org, Skodagasse, 1080, Wien, Austria

<sup>d</sup> Faculty of Symbiotic Systems Science, Fukushima University, Fukushima 960-1296, Japan

<sup>e</sup> Energy System Division, Advanced PV Technology Group, Panasonic Corporation, Osaka 597-0094, Japan

#### **Table of Contents**\*

\*All calculated data were obtained using B3LYP/6-311++G(d,p).

**Table S1.** NBO charges and bond lengths in RC(P1)

**Table S2.** NBO charges and bond lengths in RC(P2)

**Table S3.** NBO charges and bond lengths in CPS

**Table S4.** Sum of electronic and thermal Enthalpies of CPS, BH<sub>3</sub>, and H<sub>2</sub>

**Table S5.** Sum of electronic and thermal Enthalpies of each compounds

**Cartesian Coordinates of RC structures**

**Cartesian Coordinates of TS structures**

**Fig. S1** <sup>1</sup>H NMR spectrum of the mixture of CPS and BH<sub>3</sub>·THF

**Fig. S2** Arrhenius plot for the dehydrogenation ratio for 1 h

**Fig. S3** <sup>29</sup>Si NMR spectrum of polymerized CPS and the mixture (polymerized CPS + BH<sub>3</sub>·THF)

**Table S1.** NBO charges and bond lengths in RC(P1).

| Atom | Number | Natural charge |
|------|--------|----------------|
| Si   | 1      | 0.42885        |
| B    | 2      | -0.34117       |
| H    | 3      | -0.0122        |
| H    | 4      | 0.00266        |
| H    | 5      | -0.01094       |
| H    | 6      | -0.10678       |
| H    | 7      | -0.04767       |
| Si   | 8      | 0.23506        |
| Si   | 9      | 0.26183        |
| H    | 10     | -0.09979       |
| H    | 11     | -0.10565       |
| Si   | 12     | 0.22833        |
| H    | 13     | -0.10493       |
| H    | 14     | -0.11451       |
| Si   | 15     | 0.23300        |
| H    | 16     | -0.11265       |
| H    | 17     | -0.10840       |
| H    | 18     | -0.10670       |
| H    | 19     | -0.11832       |

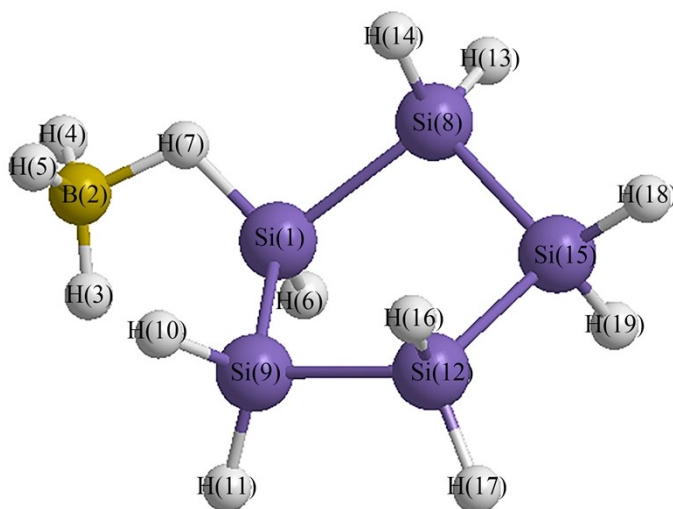

| Bond          | Length (angstroms) |
|---------------|--------------------|
| Si(1)-H(7)    | 1.5719             |
| Si(1)-H(6)    | 1.4820             |
| Si(8)-H(13)   | 1.4870             |
| Si(8)-H(14)   | 1.4894             |
| Si(9)-H(10)   | 1.4854             |
| Si(9)-H(11)   | 1.4867             |
| Si(12)-H(16)  | 1.4888             |
| Si(12)-H(17)  | 1.4877             |
| Si(15)-H(18)  | 1.4873             |
| Si(15)-H(19)  | 1.4898             |
| B(2)-H(3)     | 1.2038             |
| B(2)-H(4)     | 1.1974             |
| B(2)-H(5)     | 1.1956             |
| B(2)-H(7)     | 1.3753             |
| Si(1)-B(2)    | 2.4173             |
| Si(1)-Si(8)   | 2.3751             |
| Si(8)-Si(15)  | 2.3637             |
| Si(15)-Si(12) | 2.3690             |
| Si(12)-Si(9)  | 2.3770             |
| Si(9)-Si(1)   | 2.3662             |

**Table S2.** NBO charges and bond lengths in RC(P2).

| Atom | Number | Natural charge |
|------|--------|----------------|
| Si   | 1      | 0.43074        |
| B    | 2      | -0.37026       |
| H    | 3      | 0.00473        |
| H    | 4      | -0.03113       |
| H    | 5      | 0.00467        |
| H    | 6      | -0.11490       |
| H    | 7      | -0.03994       |
| Si   | 8      | 0.25638        |
| Si   | 9      | 0.25635        |
| H    | 10     | -0.11680       |
| H    | 11     | -0.09957       |
| Si   | 12     | 0.23903        |
| H    | 13     | -0.09958       |
| H    | 14     | -0.11683       |
| Si   | 15     | 0.23905        |
| H    | 16     | -0.11338       |
| H    | 17     | -0.10761       |
| H    | 18     | -0.11334       |
| H    | 19     | -0.10761       |

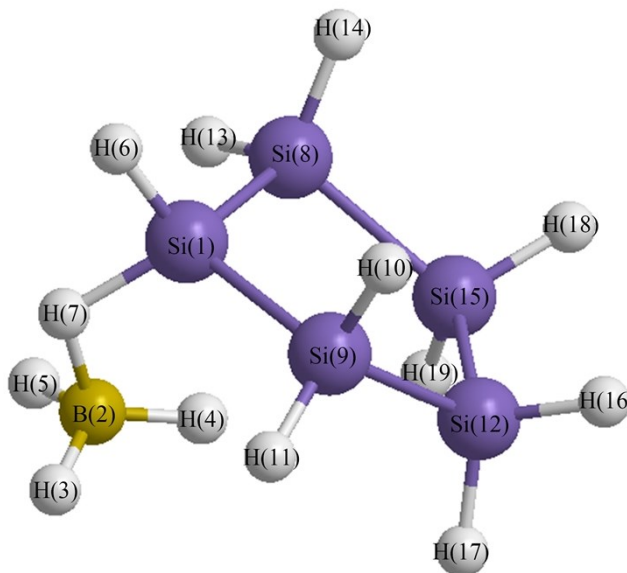

| Bond          | Length (angstroms) |
|---------------|--------------------|
| Si(1)-H(7)    | 1.5890             |
| Si(1)-H(6)    | 1.4929             |
| Si(8)-H(13)   | 1.4854             |
| Si(8)-H(14)   | 1.4900             |
| Si(9)-H(10)   | 1.4900             |
| Si(9)-H(11)   | 1.4854             |
| Si(12)-H(16)  | 1.4888             |
| Si(12)-H(17)  | 1.4866             |
| Si(15)-H(18)  | 1.4887             |
| Si(15)-H(19)  | 1.4866             |
| B(2)-H(3)     | 1.1960             |
| B(2)-H(4)     | 1.2092             |
| B(2)-H(5)     | 1.1960             |
| B(2)-H(7)     | 1.3481             |
| Si(1)-B(2)    | 2.3947             |
| Si(1)-Si(8)   | 2.3572             |
| Si(8)-Si(15)  | 2.3705             |
| Si(15)-Si(12) | 2.3787             |
| Si(12)-Si(9)  | 2.3707             |
| Si(9)-Si(1)   | 2.3572             |

**Table S3.** NBO charges and bond lengths in CPS. The average NBO charges for Si and H are 0.2302 and  $-0.1151$ , respectively, and the average bond length for Si-H and Si-Si are 1.489 and 2.369, respectively.

| Atom | Number | Natural charge |
|------|--------|----------------|
| Si   | 1      | 0.22985        |
| Si   | 2      | 0.23021        |
| Si   | 3      | 0.22994        |
| Si   | 4      | 0.22995        |
| Si   | 5      | 0.23112        |
| H    | 6      | $-0.11979$     |
| H    | 7      | $-0.11111$     |
| H    | 8      | $-0.11569$     |
| H    | 9      | $-0.11305$     |
| H    | 10     | $-0.11125$     |
| H    | 11     | $-0.11918$     |
| H    | 12     | $-0.12118$     |
| H    | 13     | $-0.11091$     |
| H    | 14     | $-0.11639$     |
| H    | 15     | $-0.11251$     |

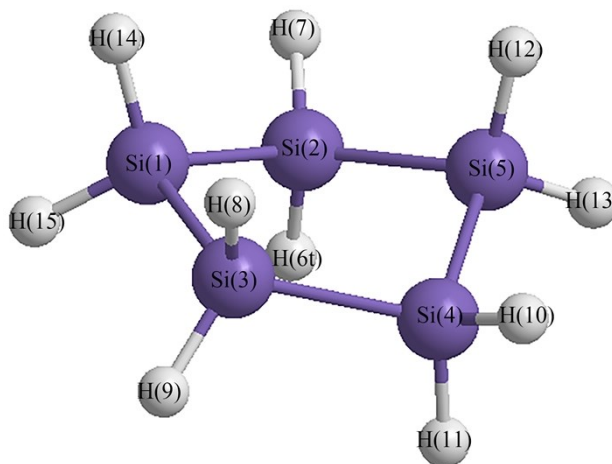

| Bond        | Length (angstroms) |
|-------------|--------------------|
| Si(1)-H(14) | 1.4895             |
| Si(1)-H(15) | 1.4886             |
| Si(2)-H(6)  | 1.4902             |
| Si(2)-H(7)  | 1.4881             |
| Si(3)-H(8)  | 1.4893             |
| Si(3)-H(9)  | 1.4887             |
| Si(4)-H(10) | 1.4882             |
| Si(4)-H(11) | 1.4901             |
| Si(5)-H(12) | 1.4903             |
| Si(5)-H(13) | 1.4880             |
| Si(1)-Si(2) | 2.3694             |
| Si(2)-Si(5) | 2.3633             |
| Si(5)-Si(4) | 2.3638             |
| Si(4)-Si(3) | 2.3715             |
| Si(3)-Si(1) | 2.3778             |

**Table S4.** Sum of electronic and thermal Enthalpies (unit: Hartree) of CPS, BH<sub>3</sub>, and H<sub>2</sub>.

| Compound        |              |
|-----------------|--------------|
| CPS             | -1453.525248 |
| BH <sub>3</sub> | -26.591173   |
| H <sub>2</sub>  | -1.166202    |

**Table S5.** Sum of electronic and thermal Enthalpies (unit: Hartree) of each compounds.

| Pathway | Compounds    |              |              |              |                              |
|---------|--------------|--------------|--------------|--------------|------------------------------|
|         | RC           | TS1          | IC           | TS2          | FP (without H <sub>2</sub> ) |
| P1      | -1480.121372 | -1480.108772 | -1480.109223 | -1480.106228 | -1478.941673                 |
| P2      | -1480.123010 | -1480.110349 | -1480.110229 | -1480.064642 | -1478.933466                 |
| P3      | -2932.469268 | -2932.460848 | -2932.459539 | -2932.454111 | -2931.294459                 |
| P4      | -2932.475394 | -2932.459120 | -2932.458058 | -2932.452559 | -2931.294466                 |
| P5      | -2932.475386 | -2932.417862 |              |              | -2931.297712                 |

### Cartesian Coordinates of RC structures

RC(P1)

| Atom | Coordinates (Angstroms) |           |           |
|------|-------------------------|-----------|-----------|
|      | X                       | Y         | Z         |
| Si   | -0.724918               | 1.480308  | -0.271429 |
| B    | -2.237213               | 2.504926  | -1.854539 |
| H    | -1.129849               | 2.825419  | -2.201213 |
| H    | -2.896038               | 3.405771  | -1.420614 |
| H    | -2.75907                | 1.659369  | -2.519534 |
| H    | -0.024867               | 2.717579  | 0.147256  |
| H    | -2.20863                | 1.825522  | -0.659071 |
| Si   | -1.159379               | 0.145087  | 1.644193  |
| Si   | 0.534517                | 0.107488  | -1.730187 |
| H    | -0.362004               | -0.450479 | -2.774879 |
| H    | 1.593726                | 0.924363  | -2.379156 |
| Si   | 1.432089                | -1.621518 | -0.368125 |
| H    | -1.521662               | 0.941665  | 2.846471  |
| H    | -2.270271               | -0.797951 | 1.336232  |
| Si   | 0.858005                | -1.067245 | 1.862383  |
| H    | 0.786807                | -2.910042 | -0.741951 |
| H    | 2.901572                | -1.76123  | -0.553773 |
| H    | 0.743211                | -2.258396 | 2.74559   |
| H    | 1.900382                | -0.161671 | 2.421783  |

RC(P2)

| Atom | Coordinates (Angstroms) |           |           |
|------|-------------------------|-----------|-----------|
|      | X                       | Y         | Z         |
| Si   | 0.923299                | 1.125514  | 1.427163  |
| B    | -0.35473                | -0.307637 | 2.858053  |
| H    | 0.303939                | -1.095613 | 3.470993  |
| H    | -0.583003               | -0.652949 | 1.721916  |
| H    | -1.281463               | 0.233895  | 3.38562   |
| H    | 1.810245                | 2.21553   | 1.931078  |
| H    | 0.509592                | 0.725668  | 2.908299  |
| Si   | -0.850433               | 1.897442  | 0.080173  |
| Si   | 2.072051                | -0.552525 | 0.235121  |
| H    | 3.138583                | 0.107442  | -0.569324 |
| H    | 2.70222                 | -1.540004 | 1.148502  |
| Si   | 0.423211                | -1.488874 | -1.187833 |
| H    | -1.986044               | 2.392888  | 0.899569  |
| H    | -0.335121               | 3.018461  | -0.755255 |
| Si   | -1.399877               | 0.0362    | -1.28121  |
| H    | 0.991924                | -1.699516 | -2.547464 |
| H    | -0.027584               | -2.804307 | -0.662071 |
| H    | -1.62782                | 0.485502  | -2.682114 |
| H    | -2.644266               | -0.613059 | -0.791372 |

RC(P3)

| Atom | Coordinates (Angstroms) |           |           |
|------|-------------------------|-----------|-----------|
|      | X                       | Y         | Z         |
| Si   | 0.580613                | 0.581842  | -1.253523 |
| B    | 0.358707                | 0.647709  | 0.763019  |
| H    | 1.380452                | 0.998261  | 1.293363  |
| H    | -0.619952               | 1.175029  | 1.209369  |
| H    | -0.569187               | -0.02259  | -1.998404 |
| Si   | 0.804993                | 2.778797  | -2.120425 |
| Si   | 2.519997                | -0.552204 | -2.040056 |
| H    | -0.506219               | 3.461912  | -2.304567 |
| H    | 1.624123                | 3.610338  | -1.192122 |
| Si   | 1.998408                | 2.514983  | -4.142486 |
| H    | 2.149513                | -1.836826 | -2.701054 |
| Si   | 3.608126                | 0.872861  | -3.596261 |
| H    | 3.445443                | -0.889287 | -0.919649 |
| Si   | -0.558959               | -1.610091 | 1.124769  |
| H    | 0.542575                | -0.520274 | 1.428929  |
| Si   | -2.792854               | -0.930352 | 0.801606  |
| Si   | -0.560826               | -2.54251  | 3.306357  |
| Si   | -3.49533                | -0.174006 | 2.936577  |
| H    | -2.954831               | 0.056554  | -0.291855 |
| H    | -3.540231               | -2.174197 | 0.458499  |
| H    | -1.182026               | -3.893072 | 3.207825  |
| H    | 0.805527                | -2.677779 | 3.87548   |
| Si   | -1.976641               | -1.085823 | 4.521959  |
| H    | 0.068546                | -2.45869  | 0.083004  |
| H    | -4.882143               | -0.644831 | 3.200459  |
| H    | -3.481163               | 1.311146  | 2.995512  |
| H    | -2.685495               | -1.806991 | 5.612992  |
| H    | -1.162323               | 0.003346  | 5.124816  |
| H    | 4.767336                | 1.534009  | -2.931671 |
| H    | 4.122138                | 0.13828   | -4.785564 |
| H    | 1.082254                | 1.975819  | -5.187955 |
| H    | 2.599605                | 3.77512   | -4.66084  |

RC(P4, P5)

| Atom | Coordinates (Angstroms) |           |           |
|------|-------------------------|-----------|-----------|
|      | X                       | Y         | Z         |
| Si   | 0.362196                | 0.954716  | -1.860905 |
| B    | -0.720849               | 0.724806  | -0.138201 |
| H    | -0.012995               | 0.998868  | 0.789034  |
| H    | -1.768693               | 1.28805   | -0.283688 |
| H    | -0.399277               | 0.470551  | -3.053385 |
| Si   | 0.920326                | 3.216791  | -2.276897 |
| Si   | 2.483565                | -0.090029 | -1.953683 |
| H    | -0.242405               | 4.035498  | -2.719264 |
| H    | 1.460267                | 3.824304  | -1.027122 |
| Si   | 2.644794                | 3.14652   | -3.903561 |
| H    | 2.413664                | -1.567973 | -2.133971 |

|    |           |           |           |
|----|-----------|-----------|-----------|
| Si | 3.613868  | 0.982259  | -3.737901 |
| H  | 3.221648  | 0.175335  | -0.685075 |
| Si | -1.692339 | -0.84303  | 1.019613  |
| H  | -0.756677 | -0.499544 | -0.410629 |
| Si | -2.66676  | 0.258517  | 2.87056   |
| Si | -0.353545 | -2.528691 | 1.999036  |
| Si | -3.080368 | -1.487686 | 4.425495  |
| H  | -1.669713 | 1.209486  | 3.430235  |
| H  | -3.891426 | 1.008118  | 2.48468   |
| H  | 0.049009  | -3.594089 | 1.042332  |
| H  | 0.87309   | -1.902187 | 2.564122  |
| Si | -1.723061 | -3.324566 | 3.759763  |
| H  | -2.770411 | -1.49977  | 0.226589  |
| H  | -4.516527 | -1.877701 | 4.396961  |
| H  | -2.744266 | -1.04397  | 5.805902  |
| H  | -2.594489 | -4.418581 | 3.249046  |
| H  | -0.918846 | -3.858159 | 4.892147  |
| H  | 5.084485  | 1.049554  | -3.512296 |
| H  | 3.380346  | 0.234212  | -5.005144 |
| H  | 2.075274  | 3.339635  | -5.266567 |
| H  | 3.657116  | 4.21541   | -3.676841 |

---



### Cartesian Coordinates of TS structures

#### TS1(P1)

| Atom | Coordinates (Angstroms) |           |           |
|------|-------------------------|-----------|-----------|
|      | X                       | Y         | Z         |
| Si   | 1.730858                | -3.083191 | -0.961365 |
| B    | 0.242121                | -1.931551 | -1.889389 |
| H    | 0.774328                | -1.549629 | -2.882537 |
| H    | -0.161144               | -1.245765 | -1.004784 |
| H    | -0.801729               | -2.502102 | -2.317071 |
| H    | 2.741804                | -2.040811 | -0.625788 |
| H    | -0.067412               | -3.139927 | -1.848043 |
| Si   | 1.182469                | -4.234451 | 1.031647  |
| Si   | 2.810297                | -4.761463 | -2.232564 |
| H    | 1.770039                | -5.659762 | -2.813692 |
| H    | 3.629641                | -4.223549 | -3.352398 |
| Si   | 4.08896                 | -5.988131 | -0.659291 |
| H    | 0.879463                | -3.33094  | 2.174705  |
| H    | -0.023955               | -5.07515  | 0.777545  |
| Si   | 3.032715                | -5.656539 | 1.444962  |
| H    | 4.16202                 | -7.431504 | -1.016549 |
| H    | 5.478412                | -5.454248 | -0.610529 |
| H    | 2.606391                | -6.946251 | 2.054267  |
| H    | 3.981722                | -4.995037 | 2.382874  |

#### TS2(P1)

| Atom | Coordinates (Angstroms) |           |           |
|------|-------------------------|-----------|-----------|
|      | X                       | Y         | Z         |
| Si   | -0.641835               | 1.347439  | -0.559971 |
| B    | -2.04382                | 2.054854  | -1.81059  |
| H    | -2.909471               | 1.326369  | -2.183469 |
| H    | -1.907564               | 3.105979  | -2.351966 |
| H    | -3.705665               | 2.953433  | -0.734152 |
| H    | 0.242926                | 2.393102  | 0.035358  |
| H    | -3.177307               | 2.980076  | -0.200995 |
| Si   | -1.3342                 | -0.10459  | 1.175206  |
| Si   | 0.772665                | -0.099605 | -1.808481 |
| H    | -0.072313               | -1.032296 | -2.607127 |
| H    | 1.66755                 | 0.62784   | -2.749762 |
| Si   | 1.969793                | -1.336946 | -0.179145 |
| H    | -1.905451               | 0.61894   | 2.345493  |
| H    | -2.386758               | -1.017692 | 0.645455  |
| Si   | 0.580451                | -1.379611 | 1.745887  |
| H    | 2.300609                | -2.706754 | -0.660079 |
| H    | 3.246595                | -0.637935 | 0.136477  |
| H    | 0.220938                | -2.771561 | 2.133451  |
| H    | 1.291048                | -0.751268 | 2.89414   |

#### TS1(P2)

| Atom | Coordinates (Angstroms) |           |           |
|------|-------------------------|-----------|-----------|
|      | X                       | Y         | Z         |
| Si   | -0.012214               | -0.062937 | 0.006371  |
| B    | 0.035617                | -0.202636 | 2.090995  |
| H    | 1.187443                | -0.336427 | 2.358355  |
| H    | -0.831735               | -0.974858 | 2.351598  |
| H    | -0.295911               | 0.813952  | 2.77791   |
| H    | 0.940139                | 0.962242  | -0.516062 |
| H    | -0.32433                | 0.938352  | 1.721403  |
| Si   | -2.08885                | 0.312179  | -1.06339  |
| Si   | 0.64446                 | -2.159106 | -0.869663 |
| H    | 2.104921                | -2.404032 | -0.724132 |
| H    | -0.088338               | -3.23195  | -0.141962 |
| Si   | -0.059976               | -2.120273 | -3.134586 |
| H    | -3.13444                | -0.52639  | -0.411631 |
| H    | -2.53669                | 1.731846  | -1.007058 |
| Si   | -1.743946               | -0.448408 | -3.27943  |
| H    | 1.081637                | -1.767695 | -4.023439 |
| H    | -0.578753               | -3.450434 | -3.55701  |
| H    | -1.251967               | 0.677382  | -4.121622 |
| H    | -2.99455                | -0.971723 | -3.894365 |

TS2(P2)

| Atom | Coordinates (Angstroms) |           |           |
|------|-------------------------|-----------|-----------|
|      | X                       | Y         | Z         |
| Si   | 1.361262                | -3.497075 | -1.132185 |
| B    | 0.112104                | -2.12576  | -2.129356 |
| H    | 0.680161                | -1.875709 | -3.157025 |
| H    | -0.072736               | -1.233264 | -1.348493 |
| H    | -0.937685               | -2.725639 | -2.353571 |
| H    | 0.181757                | -4.673255 | -1.239953 |
| H    | -0.156641               | -3.852216 | -1.655613 |
| Si   | 1.550848                | -3.755864 | 1.216398  |
| Si   | 3.001238                | -4.871998 | -2.166384 |
| H    | 2.341628                | -5.852733 | -3.069413 |
| H    | 3.920961                | -4.025666 | -2.971645 |
| Si   | 4.133318                | -5.939484 | -0.376453 |
| H    | 2.392952                | -2.63625  | 1.719753  |
| H    | 0.220063                | -3.695303 | 1.875671  |
| Si   | 2.666426                | -5.821983 | 1.477789  |
| H    | 4.52141                 | -7.336364 | -0.709915 |
| H    | 5.369496                | -5.167764 | -0.068189 |
| H    | 1.655551                | -6.910749 | 1.368708  |
| H    | 3.372823                | -5.957718 | 2.780153  |

TS1(P3)

| Atom | Coordinates (Angstroms) |   |   |
|------|-------------------------|---|---|
|      | X                       | Y | Z |

|    |           |           |           |
|----|-----------|-----------|-----------|
| Si | 0.009663  | -0.001647 | 0.005413  |
| B  | 0.004624  | -0.000046 | 2.035459  |
| H  | 1.262766  | -0.000752 | 2.211811  |
| H  | -0.36051  | 0.933569  | 2.681983  |
| H  | -1.367922 | -0.257006 | -0.516119 |
| Si | 0.713889  | 2.027242  | -0.99194  |
| Si | 1.409816  | -1.635822 | -1.003619 |
| H  | -0.299338 | 3.114298  | -0.897566 |
| H  | 1.96069   | 2.501917  | -0.323701 |
| Si | 1.227769  | 1.422939  | -3.217409 |
| H  | 0.661867  | -2.889266 | -1.299366 |
| Si | 2.298109  | -0.675864 | -2.988577 |
| H  | 2.526564  | -1.993884 | -0.080029 |
| Si | -1.127177 | -1.626045 | 2.659359  |
| H  | 0.756694  | -0.762483 | 2.699289  |
| Si | -3.414306 | -1.151166 | 2.207973  |
| Si | -1.073688 | -2.182128 | 4.965236  |
| Si | -4.654756 | -1.957171 | 4.066963  |
| H  | -3.613058 | 0.313763  | 2.03956   |
| H  | -3.837261 | -1.828831 | 0.952539  |
| H  | 0.109172  | -3.011973 | 5.327705  |
| H  | -1.02454  | -0.932088 | 5.776163  |
| Si | -3.140989 | -3.263428 | 5.330421  |
| H  | -0.752834 | -2.86267  | 1.911904  |
| H  | -5.860853 | -2.719894 | 3.644186  |
| H  | -5.102046 | -0.798564 | 4.889708  |
| H  | -3.076294 | -4.637882 | 4.75896   |
| H  | -3.516507 | -3.3687   | 6.766462  |
| H  | 3.764819  | -0.4713   | -2.82175  |
| H  | 2.090018  | -1.553841 | -4.172909 |
| H  | -0.040458 | 1.243892  | -3.979577 |
| H  | 2.065436  | 2.420393  | -3.93854  |

TS2(P3)

| Atom | Coordinates (Angstroms) |           |           |
|------|-------------------------|-----------|-----------|
|      | X                       | Y         | Z         |
| Si   | 1.331217                | -0.073727 | -1.313182 |
| B    | 1.010271                | -0.155932 | 0.679094  |
| H    | 2.493038                | -1.368795 | 0.872276  |
| H    | 1.571828                | 0.649375  | 1.35457   |
| H    | 0.702915                | -1.202518 | -2.063323 |
| Si   | 0.399671                | 1.926542  | -2.189085 |
| Si   | 3.567041                | 0.117961  | -2.072431 |
| H    | -1.088175               | 1.91583   | -2.22173  |
| H    | 0.833131                | 3.072976  | -1.340907 |
| Si   | 1.35358                 | 2.155407  | -4.347429 |
| H    | 4.313933                | -1.170287 | -2.009655 |
| Si   | 3.417126                | 0.982348  | -4.272853 |
| H    | 4.285353                | 1.098929  | -1.209122 |

|    |           |           |           |
|----|-----------|-----------|-----------|
| Si | -0.670487 | -0.981927 | 1.435457  |
| H  | 2.056627  | -1.569664 | 1.460609  |
| Si | -2.364815 | 0.672879  | 1.600974  |
| Si | -0.61427  | -1.774014 | 3.667273  |
| Si | -4.01057  | -0.266603 | 3.026347  |
| H  | -1.793041 | 1.886248  | 2.250836  |
| H  | -2.919498 | 1.077382  | 0.280532  |
| H  | 0.087819  | -3.081744 | 3.80237   |
| H  | 0.111701  | -0.782043 | 4.511371  |
| Si | -2.877729 | -1.874243 | 4.357493  |
| H  | -1.225848 | -2.080206 | 0.58872   |
| H  | -5.061042 | -0.93633  | 2.210195  |
| H  | -4.669817 | 0.775999  | 3.860301  |
| H  | -3.429965 | -3.2307   | 4.086838  |
| H  | -3.028896 | -1.596406 | 5.812366  |
| H  | 4.569308  | 1.866505  | -4.600738 |
| H  | 3.398081  | -0.134956 | -5.257416 |
| H  | 0.456895  | 1.533786  | -5.361206 |
| H  | 1.542379  | 3.586053  | -4.714396 |

TS1(P4)

| Atom | Coordinates (Angstroms) |           |           |
|------|-------------------------|-----------|-----------|
|      | X                       | Y         | Z         |
| Si   | 0.735059                | 0.698853  | -1.196796 |
| B    | -0.106418               | 1.206666  | 0.580399  |
| H    | 0.924637                | 1.628675  | 1.165     |
| H    | -0.890555               | 2.099833  | 0.68405   |
| H    | -0.076039               | -0.32951  | -1.917925 |
| Si   | 0.955351                | 2.526916  | -2.683794 |
| Si   | 2.956617                | -0.121312 | -1.143593 |
| H    | -0.344783               | 3.011951  | -3.224158 |
| H    | 1.60416                 | 3.66127   | -1.964706 |
| Si   | 2.416991                | 1.763762  | -4.38389  |
| H    | 3.0714                  | -1.516528 | -0.63531  |
| Si   | 3.771342                | 0.102069  | -3.359004 |
| H    | 3.766268                | 0.750214  | -0.241574 |
| Si   | -1.133811               | -0.468082 | 1.271288  |
| H    | 0.371833                | 0.871462  | 1.688293  |
| Si   | -2.196678               | -0.268172 | 3.379611  |
| Si   | 0.009408                | -2.530358 | 1.48738   |
| Si   | -2.923339               | -2.460751 | 3.901445  |
| H    | -1.17895                | 0.156832  | 4.385009  |
| H    | -3.299291               | 0.731318  | 3.391822  |
| H    | 0.418248                | -3.128158 | 0.188695  |
| H    | 1.238454                | -2.302586 | 2.301228  |
| Si   | -1.474688               | -3.919076 | 2.707796  |
| H    | -2.205832               | -0.631642 | 0.248687  |
| H    | -4.32357                | -2.65461  | 3.433124  |
| H    | -2.884375               | -2.722858 | 5.366219  |

|   |           |           |           |
|---|-----------|-----------|-----------|
| H | -2.266855 | -4.760631 | 1.768861  |
| H | -0.730574 | -4.825118 | 3.625111  |
| H | 5.211501  | 0.481199  | -3.370382 |
| H | 3.632715  | -1.19043  | -4.086281 |
| H | 1.632061  | 1.149111  | -5.490892 |
| H | 3.237515  | 2.864781  | -4.960225 |

TS2(P4)

| Atom | Coordinates (Angstroms) |           |           |
|------|-------------------------|-----------|-----------|
|      | X                       | Y         | Z         |
| Si   | 1.200667                | 0.698984  | -0.993854 |
| B    | 0.282987                | 0.968516  | 0.779745  |
| H    | 1.717993                | -0.025105 | 1.751006  |
| H    | 0.458698                | 2.030042  | 1.296141  |
| H    | 1.113652                | -0.696928 | -1.518716 |
| Si   | 0.122957                | 2.090878  | -2.588907 |
| Si   | 3.446574                | 1.416242  | -1.209351 |
| H    | -1.230103               | 1.602137  | -2.970063 |
| H    | -0.025305               | 3.458008  | -2.013973 |
| Si   | 1.616592                | 2.176329  | -4.42764  |
| H    | 4.421071                | 0.443969  | -0.639512 |
| Si   | 3.779226                | 1.787719  | -3.526569 |
| H    | 3.608618                | 2.70522   | -0.47806  |
| Si   | -1.308908               | -0.153213 | 1.350497  |
| H    | 1.499495                | 0.445756  | 2.300798  |
| Si   | -2.17939                | 0.187595  | 3.526269  |
| Si   | -1.034865               | -2.509306 | 1.223802  |
| Si   | -3.625548               | -1.650258 | 3.861144  |
| H    | -1.064899               | 0.113266  | 4.516482  |
| H    | -2.851144               | 1.505729  | 3.694201  |
| H    | -1.303644               | -3.026077 | -0.146318 |
| H    | 0.370036                | -2.871    | 1.572195  |
| Si   | -2.507409               | -3.465594 | 2.826412  |
| H    | -2.409717               | 0.188843  | 0.395296  |
| H    | -4.905603               | -1.392556 | 3.142924  |
| H    | -3.941142               | -1.914666 | 5.291831  |
| H    | -3.464589               | -4.414784 | 2.194251  |
| H    | -1.717792               | -4.218626 | 3.840972  |
| H    | 4.692304                | 2.937716  | -3.772838 |
| H    | 4.379235                | 0.579158  | -4.156806 |
| H    | 1.275087                | 1.097523  | -5.396012 |
| H    | 1.537104                | 3.480285  | -5.141952 |

TS(P5)

| Atom | Coordinates (Angstroms) |           |           |
|------|-------------------------|-----------|-----------|
|      | X                       | Y         | Z         |
| Si   | 0.094173                | -0.10123  | -0.062522 |
| B    | 0.222838                | -0.148828 | 1.987019  |

|    |           |           |           |
|----|-----------|-----------|-----------|
| H  | 1.376716  | -0.254035 | 2.310906  |
| H  | -0.342298 | 0.838018  | 2.379209  |
| H  | 0.468539  | -1.400833 | -0.726338 |
| Si | -1.993881 | 0.447657  | -1.039516 |
| Si | 1.518145  | 1.514983  | -1.041819 |
| H  | -2.98549  | -0.666542 | -0.992845 |
| H  | -2.600855 | 1.606234  | -0.321705 |
| Si | -1.514548 | 1.09406   | -3.269647 |
| H  | 2.960107  | 1.149872  | -0.961422 |
| Si | 0.774576  | 1.733041  | -3.280949 |
| H  | 1.337217  | 2.81984   | -0.343636 |
| Si | -0.710125 | -1.691723 | 3.013772  |
| H  | -0.246871 | -1.842986 | 1.470125  |
| Si | -3.050719 | -2.01927  | 3.198207  |
| Si | 0.404457  | -3.108587 | 4.56327   |
| Si | -3.219375 | -4.146132 | 4.214154  |
| H  | -3.572269 | -0.958624 | 4.102291  |
| H  | -3.721281 | -1.915484 | 1.877223  |
| H  | 1.315628  | -4.024259 | 3.827657  |
| H  | 1.203177  | -2.278461 | 5.502183  |
| Si | -1.347798 | -4.271562 | 5.659395  |
| H  | -0.566611 | -2.752102 | 1.74109   |
| H  | 1.542089  | 0.809206  | -4.163508 |
| H  | 0.956659  | 3.115484  | -3.806103 |
| H  | -2.395736 | 2.203868  | -3.730116 |
| H  | -1.719594 | -0.057278 | -4.193731 |
| H  | -3.08485  | -5.18035  | 3.151049  |
| H  | -4.506525 | -4.357742 | 4.928633  |
| H  | -0.969731 | -5.672255 | 5.986867  |
| H  | -1.662763 | -3.555982 | 6.926809  |

---

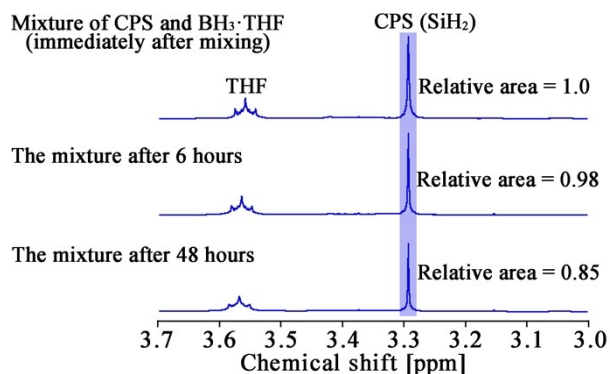

**Fig. S1**  $^1\text{H}$  NMR spectrum of the mixture of CPS and  $\text{BH}_3\cdot\text{THF}$ . The three samples are the same, except for the time. A closed NMR tube was employed to prevent sample evaporation. Relative area of CPS peak is shown in the figure (highlighted in blue). Almost no change was observed in the CPS peak at 3.29 ppm in the 6 h sample, indicating no dehydrogenation. The decreasing peak for the 48 h sample indicates dehydrogenation.

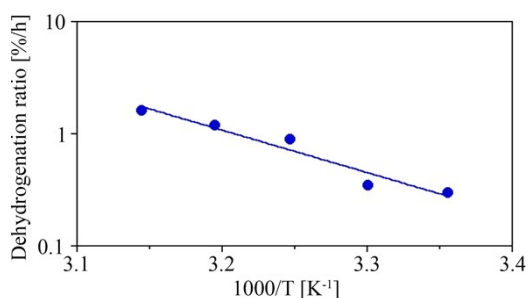

**Fig. S2** Arrhenius plot for dehydrogenation ratio for 1 h. Since the boiling point of  $\text{THF}$ , which is the main component of  $\text{BH}_3\cdot\text{THF}$ , is as low as  $66\text{ }^\circ\text{C}$ , the measurements were conducted in a lower and limited temperature range. Therefore, the quantitiveness is insufficient. The slope of the plot representing the activation energy is  $17\text{ kcal}\cdot\text{mol}^{-1}$ , and the  $T^{-1} = 0$  intercept representing the rate constant is  $1.4 \times 10^{12}\text{ mol}\% \text{H}_2\cdot\text{h}^{-1}$ .

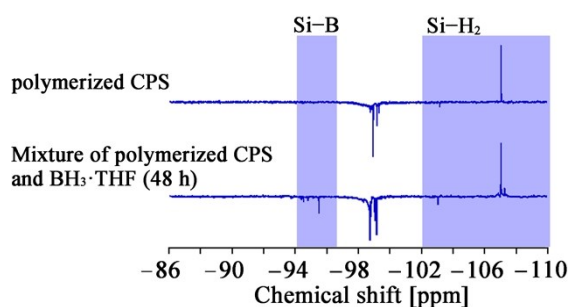

**Fig. S3**  $^{29}\text{Si}$  NMR spectrum of polymerized CPS and the mixture (polymerized CPS +  $\text{BH}_3\cdot\text{THF}$ ). The mixture was kept at  $25\text{ }^\circ\text{C}$  48 h before measurement. The growth of a peak near  $-96\text{ ppm}$  indicates that the reaction will form a Si-B bond between the polymerized CPS and  $\text{BH}_3$  proceeded.
